# Supplementary material for: Interpenetrated metal–organic frameworks and their uptake of CO2 at relatively low pressures
Source: Royal Society of Chemistry journal article supplement (doi:10.1039/c2jm15933c), 2012-01-01
Supplement: c2jm15933c.pdf [file c2jm15933c.pdf]

## Electronic Supplementary Information (ESI)

# Interpenetrated Metal Organic Frameworks and Their Uptake of CO<sub>2</sub> at Relatively Low Pressures

Qingxia Yao, Jie Su, Ocean Cheung, Qingling Liu, Niklas Hedin\* and Xiaodong Zou\*

*Department of Materials and Environmental Chemistry, Berzelii Center EXSELENT on Porous Materials, Arrhenius Laboratory, Stockholm University, S-106 91, Stockholm*  
niklas.hedin@mmk.su.se, xzou@mmk.su.se

### Thermogravimetric Analysis (TGA)

TGA was performed on a Perkin Elmer TGA 7 analyzer to study the thermal stability and the quantity of solvent guest molecules present in the SUMOFs. The SUMOFs were heated from 30 °C to 700 °C at a heating rate of 10 °C/min in a platinum holder under a continuous flow of dry air. TGA curves for the interpenetrated MOFs are given in Fig. S1.

SUMOF-2: it lost all solvents (DMF and water) with a mass loss of 25.8% before 250 °C. During this process, the entrapped zinc species, Zn(OH)<sub>2</sub>, in the pores would be dehydrated to ZnO. There is no mass loss between 250 and 450 °C. Upon heating to 480 °C in air, it starts to decompose to give 31.8% ZnO. The observed mass loss for the activated SUMOF-2 upon decomposition to ZnO is 57.1%, which matches very well with the calculated theoretical mass loss, 57.0%, suggesting that the sample is pure.

SUMOF-3: it lost all solvents (DMF and water) with a mass loss of 34.0% before 200 °C. There is no mass loss between 200 and 400 °C. Upon heating to 420 °C in air, it starts to decompose to give 23.2% ZnO. The observed mass loss for the activated SUMOF-3 upon decomposition to ZnO is 64.9%, which matches very well with the calculated theoretical mass loss 64.6%, suggesting that the sample is pure.

SUMOF-4: it lost all solvents (DMF and water) with a mass loss of 31.8% before 220 °C. There is no mass loss between 220 and 420 °C. Upon heating to 420 °C in air, it starts to decompose to give 26.4% ZnO. The observed mass loss for the activated SUMOF-4 upon decomposition to ZnO is 61.3%, which matches very well with the calculated theoretical mass loss 61.5%, suggesting that the sample is pure.

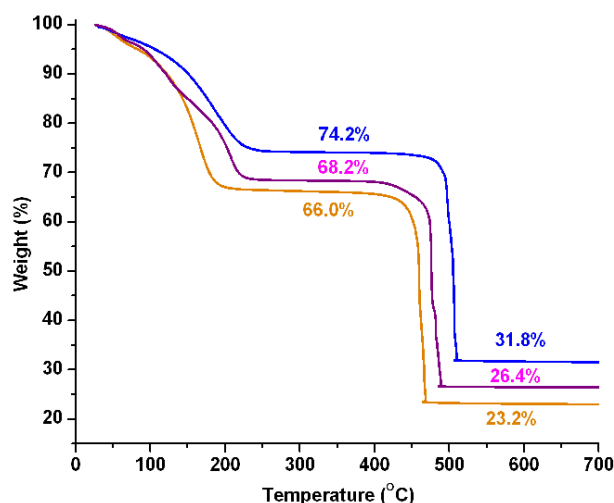

Figure S1. TGA curves for SUMOF-2 (blue line), SUMOF-3 (orange line) and SUMOF-4 (purple line). The mass of the activated SUMOFs and the remaining mass after decomposition of the SUMOFs are indicated.

## Electronic Supplementary Information (ESI)

### Nitrogen adsorption isotherms at 77 K

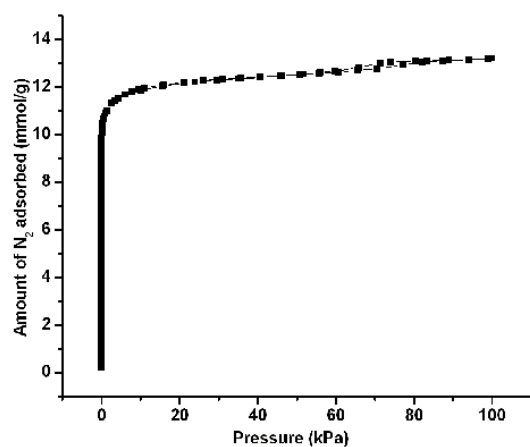

Figure S2 Nitrogen adsorption isotherm of SUMOF-2 at 77 K.

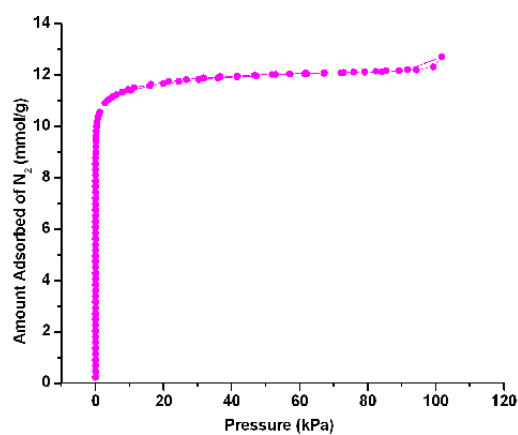

Figure S3 Nitrogen adsorption isotherm of SUMOF-3 at 77 K.

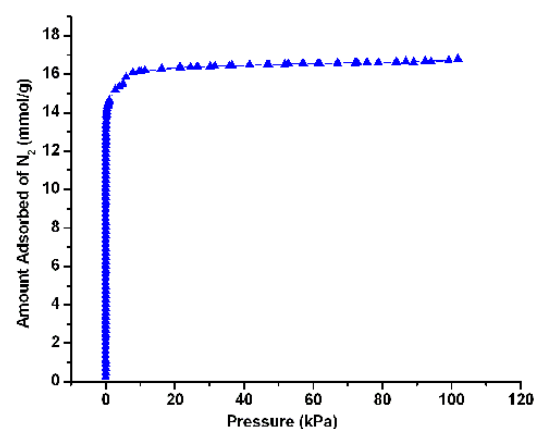

Figure S4 Nitrogen adsorption isotherm of SUMOF-4 at 77 K.

## Electronic Supplementary Information (ESI)

### Stability of activated sample in open air

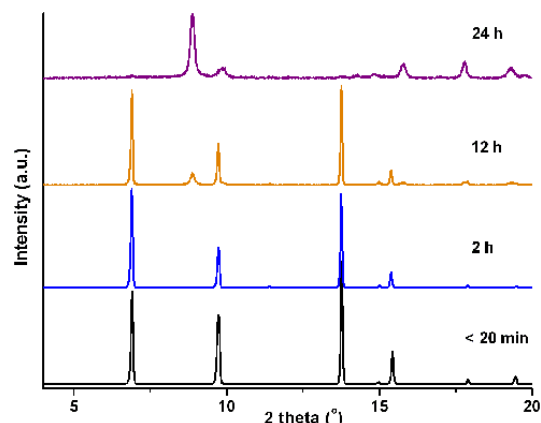

Figure S5. PXRD patterns for activated SUMOF-2 subjected to open air for various time periods. The activated sample was stable in air for at least 2 hours. After being exposed to open air for 12 hours, a new line appears at  $2\theta = 8.9^\circ$ , indicating partial conversion to a second phase. After further being exposed in air for 24 hours, two additional lines appear at  $2\theta = 15.8$  and  $17.8^\circ$ , suggesting formation of a second phase isostructural to MOF-69C.<sup>1</sup> Similar results were observed for MOF-5 in humid air.<sup>2</sup>

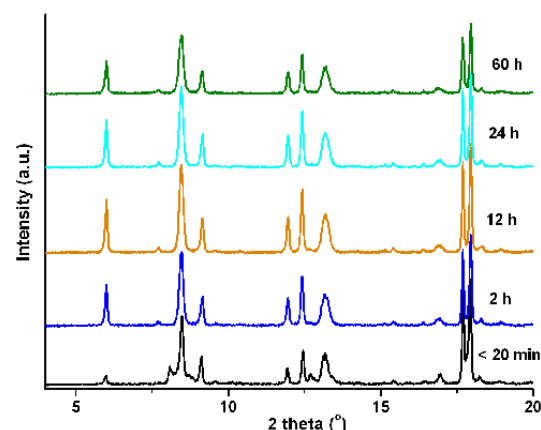

Figure S6. Powder X-ray diffraction patterns for activated SUMOF-3 subjected to open air for various amount of time. The activated sample can be stable in air at least for two and half days.

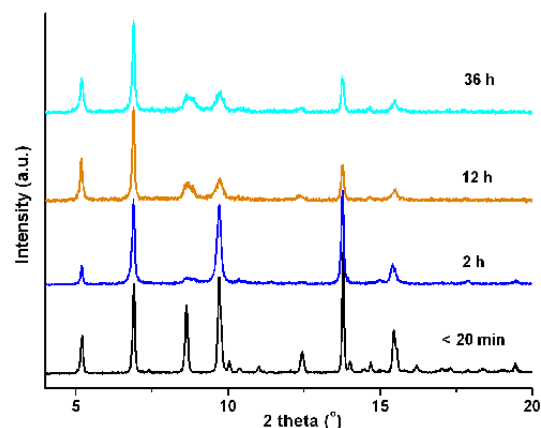

Electronic Supplementary Information (ESI)

Figure S7. Powder X-ray diffraction patterns for activated SUMOF-4 subjected to open air for various amount of time. The activated sample can stand to be subjected to open air for a long time, although some of the diffraction lines got broadened rather rapidly.

Table S1. Crystal data and structure refinements<sup>3,4</sup> for SUMOF-2, SUMOF-3 and SUMOF-4.

|                                                     |                                                                        |                                                                                                                                                             |                                                                               |
|-----------------------------------------------------|------------------------------------------------------------------------|-------------------------------------------------------------------------------------------------------------------------------------------------------------|-------------------------------------------------------------------------------|
| Identification code                                 | SUMOF-2                                                                | SUMOF-3                                                                                                                                                     | SUMOF-4                                                                       |
| Empirical formula                                   | C <sub>24</sub> H <sub>12.25</sub> O <sub>14</sub> Zn <sub>4.125</sub> | C <sub>75</sub> H <sub>50</sub> NO <sub>31.7</sub> Zn <sub>8</sub>                                                                                          | C <sub>33</sub> H <sub>24</sub> NO <sub>15</sub> Zn <sub>4</sub>              |
| Formula weight                                      | 794.24                                                                 | 1995.32                                                                                                                                                     | 936.01                                                                        |
| Temperature (K)                                     | 293(2)                                                                 | 293(2)                                                                                                                                                      | 293(2)                                                                        |
| Wavelength (Å)                                      | 0.71073                                                                | 0.71073                                                                                                                                                     | 0.71073                                                                       |
| Crystal system                                      | Trigonal                                                               | Triclinic                                                                                                                                                   | Orthorhombic                                                                  |
| Space group                                         | <i>R</i> -3 <i>m</i>                                                   | <i>P</i> -1                                                                                                                                                 | <i>Pnnm</i>                                                                   |
| Unit cell                                           | <i>a</i> = 18.4010(10) Å<br><i>c</i> = 44.057(3) Å                     | <i>a</i> = 18.6086(8) Å<br><i>b</i> = 20.2422(7) Å<br><i>c</i> = 20.8135(7) Å<br><i>α</i> = 70.421(3) °<br><i>β</i> = 68.955(3) °<br><i>γ</i> = 68.031(4) ° | <i>a</i> = 18.3770(6) Å<br><i>b</i> = 17.3043(4) Å<br><i>c</i> = 17.9565(5) Å |
| Volume (Å <sup>3</sup> )                            | 12918.9(14)                                                            | 6600.7(4)                                                                                                                                                   | 5710.2(3)                                                                     |
| <i>Z</i>                                            | 12                                                                     | 2                                                                                                                                                           | 4                                                                             |
| Density (calculated)                                | 1.225 g/cm <sup>3</sup>                                                | 1.004 g/cm <sup>3</sup>                                                                                                                                     | 1.089 g/cm <sup>3</sup>                                                       |
| Absorption coefficient                              | 2.314                                                                  | 1.479                                                                                                                                                       | 1.705                                                                         |
| <i>F</i> (000)                                      | 4704                                                                   | 2001                                                                                                                                                        | 1876                                                                          |
| Crystal size (mm <sup>3</sup> )                     | 0.30 × 0.30 × 0.25                                                     | 0.20 × 0.15 × 0.15                                                                                                                                          | 0.25 × 0.20 × 0.20                                                            |
| Crystal color                                       | colorless                                                              | colorless                                                                                                                                                   | colorless                                                                     |
| Theta range for data collection                     | 4.13° < <i>θ</i> < 26.37°                                              | 4.14° < <i>θ</i> < 26.37°                                                                                                                                   | 4.20° < <i>θ</i> < 26.37°                                                     |
| Index ranges                                        | -22 ≤ <i>h</i> ≤ 18,<br>-21 ≤ <i>k</i> ≤ 22,<br>-55 ≤ <i>l</i> ≤ 44    | -23 ≤ <i>h</i> ≤ 23,<br>-25 ≤ <i>k</i> ≤ 22,<br>-19 ≤ <i>l</i> ≤ 26                                                                                         | -22 ≤ <i>h</i> ≤ 13,<br>-21 ≤ <i>k</i> ≤ 12,<br>-22 ≤ <i>l</i> ≤ 22           |
| Reflections collected                               | 29350                                                                  | 45520                                                                                                                                                       | 19462                                                                         |
| Unique reflections                                  | 3211 ( <i>R</i> <sub>(int)</sub> = 0.1114)                             | 26227 ( <i>R</i> <sub>(int)</sub> = 0.0490)                                                                                                                 | 5966 ( <i>R</i> <sub>(int)</sub> = 0.0419)                                    |
| Completeness to theta                               | 0.992                                                                  | 0.973                                                                                                                                                       | 0.986                                                                         |
| Absorption correction                               | Multi-scan                                                             | Multi-scan                                                                                                                                                  | Multi-scan                                                                    |
| Min. and max. transmission                          | 0.96827 and 1.00000                                                    | 0.92284 and 1.00000                                                                                                                                         | 0.85492 and 1.00000                                                           |
| Observed reflections                                | 2326                                                                   | 15115                                                                                                                                                       | 4341                                                                          |
| Goodness-of-fit on <i>F</i> <sup>2</sup>            | 1.098                                                                  | 1.002                                                                                                                                                       | 1.086                                                                         |
| Final <i>R</i> indices [ <i>I</i> > 2σ( <i>I</i> )] | <i>R</i> 1 = 0.0890,<br><i>wR</i> 2 = 0.2153                           | <i>R</i> 1 = 0.0590,<br><i>wR</i> 2 = 0.1616                                                                                                                | <i>R</i> 1 = 0.0545,<br><i>wR</i> 2 = 0.1828                                  |
| <i>R</i> indices (all data)                         | <i>R</i> 1 = 0.1143,<br><i>wR</i> 2 = 0.2308                           | <i>R</i> 1 = 0.0916,<br><i>wR</i> 2 = 0.1745                                                                                                                | <i>R</i> 1 = 0.0738,<br><i>wR</i> 2 = 0.1937                                  |

## Electronic Supplementary Information (ESI)

Table S2. Comparison of the unit cells and voids of the non-interpenetrated analogues of SUMOF-2 to SUMOF-4.

|                               | SUMOF-2                                                                                                 | SUMOF-3                                                                                                      | SUMOF-4                                                                                                                          |
|-------------------------------|---------------------------------------------------------------------------------------------------------|--------------------------------------------------------------------------------------------------------------|----------------------------------------------------------------------------------------------------------------------------------|
| Ligand                        | <br>H <sub>3</sub> BDC | <br>2,6-H <sub>2</sub> NDC | <br>H <sub>2</sub> BDC<br>H <sub>2</sub> BPDC |
| Unit cell                     | a= b=12.9Å, c=12.9Å,<br>α=90.8°, β=90.8°, γ=90.8°                                                       | a=b=15.1Å, c=15.0Å,<br>α=92.7°, β=76.5°, γ=84.3°                                                             | a=b=12.9Å, c=17.3Å,<br>α=88.8°, β=88.8°, γ=88.6°                                                                                 |
| Cell volume (Å <sup>3</sup> ) | 2417                                                                                                    | 3300                                                                                                         | 2876                                                                                                                             |
| Void (%)                      | 44.2                                                                                                    | 58.3                                                                                                         | 54.4                                                                                                                             |

## References

1. Rosi, N. L.; Kim, J.; Eddaoudi, M.; Chen, B.; O'Keeffe, M.; Yaghi, O. M. *J. Am. Chem. Soc.* 2005, **127**, 1504.
2. S. S. Kaye, A. Dailly, O. M. Yaghi and J. R. Long, *J. Am. Chem. Soc.*, 2007, **129**, 14176.
3. Sheldrick, G. M. *Acta Crystallogr.* **2008**, *A64*, 112-122.
4. Spek, A. L. *J. Appl. Cryst.* **2003**, *36*, 7-13.
